# Supplementary material
Source: PubMed Central journal article supplement (PMC4596674)
Supplement: 10.1534_115.180018_genetics.115.180018-4.pdf [file 10.1534_115.180018_genetics.115.180018-4.pdf]

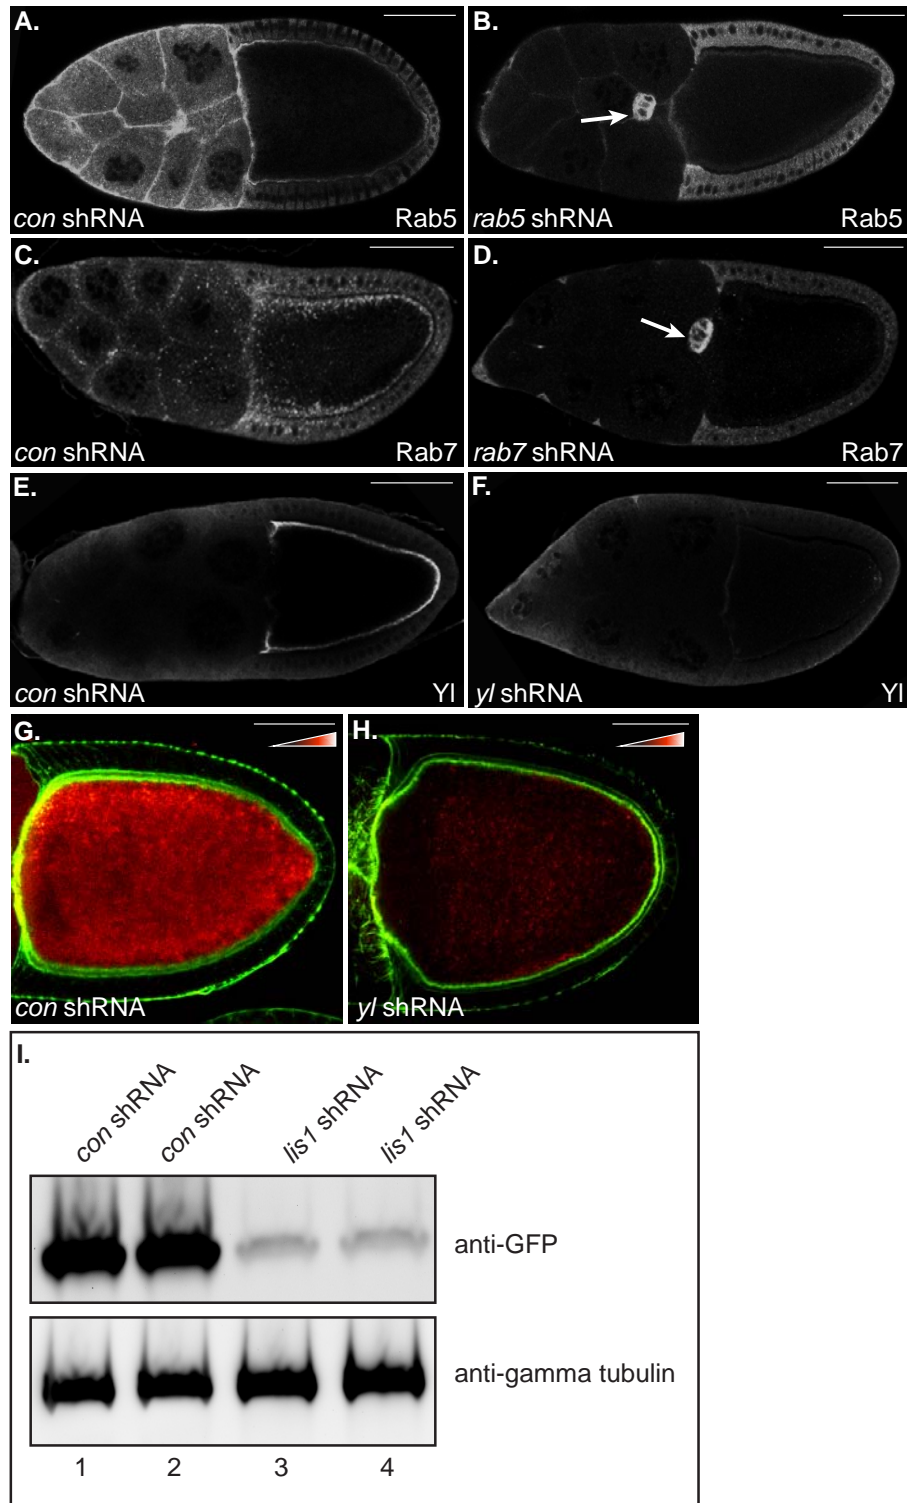

**Figure S1 Depletion of Rab5, Rab7, Yl, and Lis1.**

A-B. Egg chambers expressing a control shRNA (A) or shRNA against *rab5* (B) were fixed and processed for immunofluorescence using an antibody against Rab5. Representative egg chambers are shown. The arrow indicates somatic border cells. Neither the driver nor the shRNA is expressed in these cells. The border cells therefore represent a good control for the specificity of the depletion.

C-D. Egg chambers expressing a control shRNA (C) or shRNA against *rab7* (D) were fixed and processed for immunofluorescence using an antibody against Rab7. Representative egg chambers are shown. The arrow indicates somatic border cells.

E-F. Egg chambers expressing a control shRNA (E) or shRNA against *yl* (F) were fixed and processed for immunofluorescence using an antibody against Yl. Representative egg chambers are shown.

G-H. Egg chambers expressing a control shRNA (G) or shRNA against *yl* (H) were fixed and stained to reveal the actin cytoskeleton (green). Auto-fluorescent yolk particles are displayed using a color-coded range indicator.

I. Lysates were prepared from *Drosophila* S2 cells co-expressing either a control shRNA against *sh3px1* and GFP-Lis1 (Lanes 1, 2) or *lis1* shRNA-A and GFP-Lis1 (Lanes 3, 4). The lysates were run on an SDS-PAGE gel and examined by western blotting using an antibody against GFP. The blot was subsequently stripped and re-probed using an antibody against gamma-tubulin.

The scale bar on these images represents 50 microns.
