# Supplementary material
Source: PubMed Central journal article supplement (PMC4596674)
Supplement: 10.1534_115.180018_genetics.115.180018-5.pdf [file 10.1534_115.180018_genetics.115.180018-5.pdf]

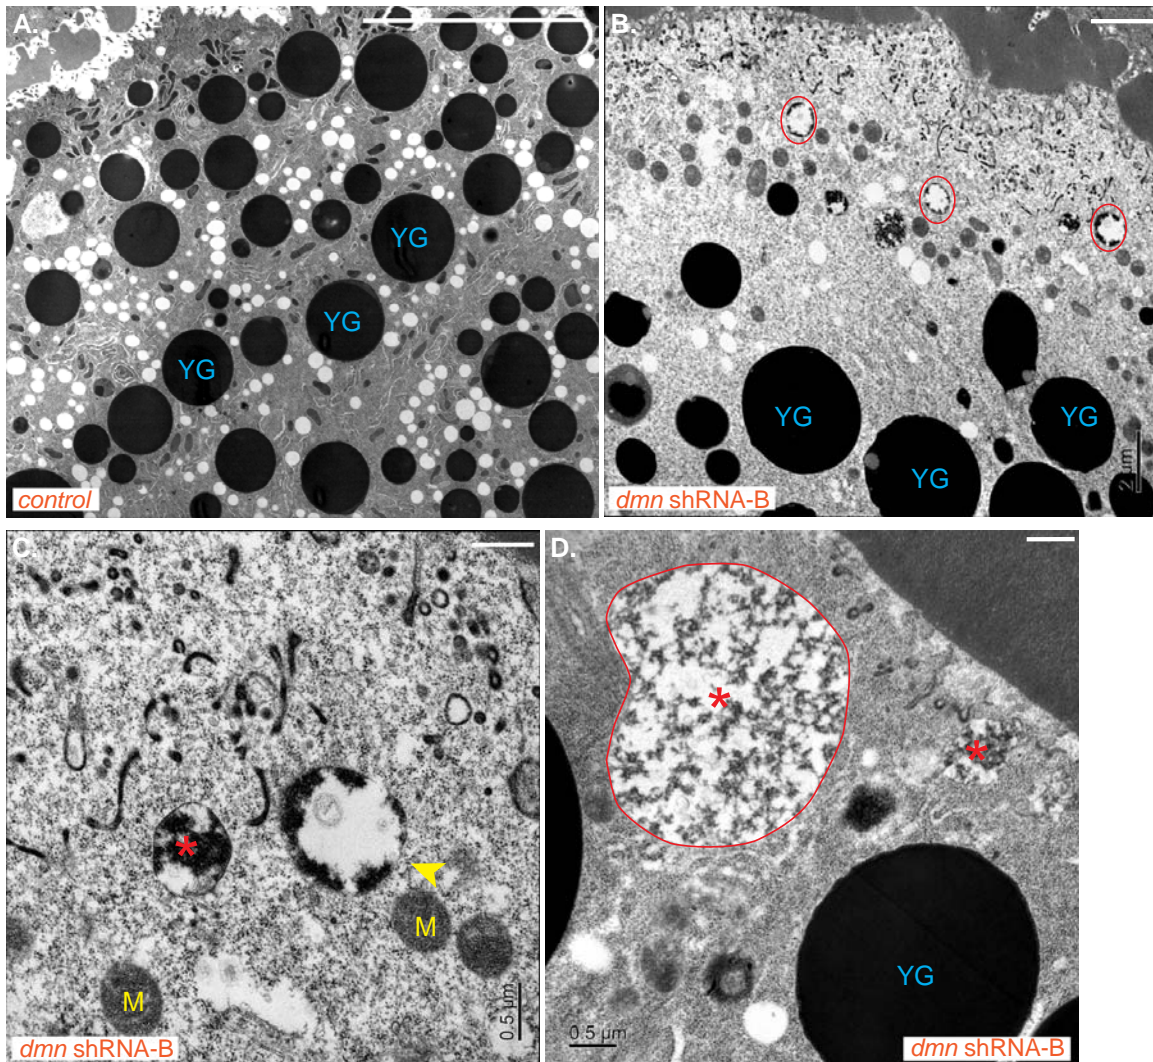

**Figure S3 Ultra-structural images of Dmn depleted oocytes.**

A. The ultra-structure of an oocyte expressing a control shRNA is shown. The scale bar is 2 microns.

B. The ultra-structure of an oocyte expressing a *dmn* shRNA-B is shown. The scale bar is 2 microns.

C-D. The ultra-structure of oocytes expressing a *dmn* shRNA-B is shown. The scale bar is 0.5 microns.

YG indicates condensed yolk granules. M indicates mitochondria. The red circles indicate endocytic intermediates. The arrowhead indicates endocytic intermediate structures containing some yolk and intraluminal vesicles. The asterisk indicates endocytic vesicles with partially condensed yolk proteins.
